# Supplementary material for: Opportunities of the Technological Trends Linked to Industry 4.0 for Achieve Sustainable Manufacturing Objectives
Source: MDPI journal article supplement (doi:10.3390/su141811118), 2022-09-06
Supplement: s1 [file s1]

Table S1. Table of references.

| Authors                        | Study Type | Subgroup |    |    |     | Publication Venue                                           | SJR  | h5 Index | Year | # of Citations |
|--------------------------------|------------|----------|----|----|-----|-------------------------------------------------------------|------|----------|------|----------------|
|                                |            | IoT      | AM | CC | CPS |                                                             |      |          |      |                |
| Rathee et al. [117]            | Research   | ✓        |    |    |     | Journal of Ambient Intelligence and Humanized Computing     | 0.59 | 78       | 2021 | 52             |
| Fernandez-Carames et al. [118] | Review     | ✓        |    |    |     | IEEE Access                                                 | 0.59 | 233      | 2019 | 189            |
| Meidan et al. [119]            | Research   | ✓        |    |    |     | IEEE Pervasive Computing                                    | 0.68 | 41       | 2018 | 586            |
| Pedone and Mezgár [120]        | Case study |          |    | ✓  |     | Computers in Industry                                       | 1.43 | 109      | 2018 | 72             |
| Wan et al. [121]               | Research   | ✓        |    |    |     | IEEE Transactions on Industrial Informatics                 | 2.5  | 149      | 2019 | 176            |
| Gupta et al. [122]             | Review     | ✓        |    |    |     | Computers & Electrical Engineering                          | 0.63 | 89       | 2020 | 63             |
| Sahi et al. [123]              | Research   |          |    |    | ✓   | IEEE Access                                                 | 0.59 | 233      | 2017 | 101            |
| Hassan et al. [124]            | Research   |          |    | ✓  |     | IEEE Transactions on Industrial Informatics                 | 2.5  | 149      | 2020 | 49             |
| Saura et al. [125]             | Research   | ✓        |    |    |     | Enterprise Information Systems                              | 0.6  | 53       | 2021 | 12             |
| Tran et al. [126]              | Research   | ✓        |    |    |     | IEEE Access                                                 | 0.59 | 233      | 2021 | 25             |
| Rahman et al. [127]            | Research   |          |    |    | ✓   | IEEE Communications Magazine                                | 2.82 | 206      | 2021 | 4              |
| Wu et al. [72]                 | Research   | ✓        |    |    |     | IEEE Internet of Things Journal                             | 2.08 | 184      | 2021 | 87             |
| Bodkhe et al. [128]            | Review     |          |    | ✓  |     | IEEE Access                                                 | 0.59 | 233      | 2020 | 193            |
| Sikorski et al. [130]          | Research   |          |    |    | ✓   | Applied Energy                                              | 3.04 | 203      | 2017 | 623            |
| Panda et al. [131]             | Research   | ✓        |    |    |     | Computers & Electrical Engineering                          | 0.63 | 89       | 2022 | 1              |
| Kuo et al. [132]               | Research   |          |    |    | ✓   | Journal of Manufacturing Systems                            | 2.31 | 89       | 2021 | 7              |
| Aziz [133]                     | Research   | ✓        |    |    |     | IEEE Internet of Things Journal                             | 2.08 | 184      | 2020 | 2              |
| Montori et al. [134]           | Review     | ✓        |    |    |     | Pervasive and Mobile Computing                              | 0.69 | 60       | 2018 | 65             |
| Dalenogare et al. [135]        | Review     |          | ✓  |    |     | International Journal of Production Economics               | 2.41 | 140      | 2018 | 960            |
| Abdul-Rashid et al. [136]      | Research   |          |    |    |     | International Journal of Operations & Production Management | 2.16 | 85       | 2017 | 275            |
| Rajput and Singh [137]         | Research   | ✓        |    |    |     | International Journal of Information Management             | 2.77 | 164      | 2019 | 231            |
| Nascimento et al. [93]         | Review     |          | ✓  |    |     | Journal of Manufacturing Technology Management              | 1.29 | 70       | 2019 | 339            |

| Authors                       | Study Type | Subgroup |    |    |     | Publication Venue                                                 | SJR  | h5 Index | Year | # of Citations |
|-------------------------------|------------|----------|----|----|-----|-------------------------------------------------------------------|------|----------|------|----------------|
|                               |            | IoT      | AM | CC | CPS |                                                                   |      |          |      |                |
| Bai et al. [99]               | Case study | ✓        | ✓  | ✓  | ✓   | International Journal of Production Economics                     | 2.41 | 140      | 2020 | 249            |
| Kerin and Pham [2]            | Review     | ✓        |    |    |     | Journal of Cleaner Production                                     | 1.94 | 245      | 2019 | 153            |
| Bányai et al. [138]           | Research   |          |    |    | ✓   | International Journal of Environmental Research and Public Health | 0.75 | 159      | 2019 | 80             |
| Kumar et al. [107]            | Research   | ✓        | ✓  | ✓  | ✓   | Journal of Cleaner Production                                     | 1.94 | 245      | 2020 | 108            |
| Koh et al. [139]              | Research   |          |    |    | ✓   | International Journal of Operations & Production Management       | 2.16 | 85       | 2019 | 122            |
| Shahin et al. [140]           | Review     | ✓        | ✓  | ✓  | ✓   | International Journal of Advanced Manufacturing Technology        | 0.95 | 100      | 2020 | 49             |
| Nara et al. [1]               | Research   |          |    |    | ✓   | Sustainable Production and Consumption                            | 1.02 | 53       | 2021 | 56             |
| Gottge et al. [141]           | Case study | ✓        |    |    |     | Industrial Management and Data Systems                            | 0.99 | 80       | 2020 | 38             |
| Agostini and Nosella, [142]   | Case study | ✓        | ✓  | ✓  | ✓   | Management Decision                                               | 0.92 | 83       | 2020 | 50             |
| Mehrpouya et al [143]         | Review     |          | ✓  |    |     | Applied Sciences                                                  | 0.44 | 96       | 2019 | 140            |
| Chen et al. [144]             | Case study |          |    | ✓  |     | IEEE Access                                                       | 0.59 | 233      | 2017 | 774            |
| Osterrieder et al [68]        | Review     |          |    |    | ✓   | International Journal of Production Economics                     | 2.41 | 140      | 2020 | 183            |
| Syberfeldt et al [145]        | Research   |          |    |    | ✓   | IEEE Access                                                       | 0.59 | 233      | 2017 | 177            |
| Sjödin et al. [146]           | Case study | ✓        |    |    |     | Research-Technology Management                                    | 0.81 | 49       | 2018 | 230            |
| Wan et al. [147]              | Research   |          |    |    | ✓   | IEEE Transactions on Industrial Informatics                       | 2.5  | 149      | 2018 | 79             |
| Bag and Pretorius [148]       | Review     |          |    |    | ✓   | International Journal of Organizational Analysis                  | 0.42 | 43       | 2020 | 90             |
| Enyoghasi and Badurdeen [149] | Review     | ✓        |    |    |     | Resources, Conservation and Recycling                             | 2.47 | 133      | 2021 | 65             |
| Dallasega et al. [150]        | Research   |          |    |    | ✓   | Computers in Industry                                             | 1.43 | 109      | 2019 | 24             |
| Singh et al. [151]            | Review     |          | ✓  |    |     | Sustainability                                                    | 0.61 | 143      | 2021 | 13             |
| Jena et al. [152]             | Case study |          |    |    | ✓   | Environmental Progress & Sustainable Energy                       | 0.5  | 42       | 2020 | 50             |
| Salah et al. [153]            | Research   |          | ✓  |    |     | Sustainability                                                    | 0.61 | 143      | 2019 | 70             |
| Zhong et al. [111]            | Review     |          |    | ✓  |     | Engineering                                                       | 1.38 | --       | 2017 | 1669           |
| Moeuf et al. [154]            | Case study |          |    | ✓  |     | International Journal of Production Research                      | 1.91 | 139      | 2017 | 739            |

| Authors                                | Study Type | Subgroup |    |    |     | Publication Venue                                                | SJR  | h5 Index | Year | # of Citations |
|----------------------------------------|------------|----------|----|----|-----|------------------------------------------------------------------|------|----------|------|----------------|
|                                        |            | IoT      | AM | CC | CPS |                                                                  |      |          |      |                |
| Javaid et al. [155]                    | Review     |          |    |    | ✓   | Diabetes & Metabolic Syndrome: Clinical Research & Reviews       | 0.68 | 96       | 2020 | 489            |
| Jung et al. [156]                      | Case study |          |    | ✓  |     | Production Planning & Control                                    | 1.33 | 82       | 2017 | 82             |
| Wan et al. [157]                       | Research   |          |    | ✓  |     | IEEE Transactions on Industrial Informatics                      | 2.5  | 149      | 2018 | 193            |
| Shiue et al. [17]                      | Research   |          |    |    | ✓   | Computers & Industrial Engineering                               | 1.32 | 104      | 2018 | 104            |
| Shivajee et al. [158]                  | Case study |          |    | ✓  |     | Journal of Cleaner Production                                    | 1.94 | 245      | 2019 | 42             |
| Cárcel-Carrasco and Gómez-Gómez, [159] | Research   |          |    | ✓  |     | Processes                                                        | 0.41 | 49       | 2021 | 22             |
| Tiwari and Khan [110]                  | Research   | ✓        |    |    |     | Journal of Cleaner Production                                    | 1.94 | 245      | 2020 | 66             |
| Trappey et al. [160]                   | Review     | ✓        |    |    |     | Advanced Engineering Informatics                                 | 1.11 | 65       | 2017 | 313            |
| Wu [161]                               | Research   | ✓        | ✓  | ✓  | ✓   | International Journal of Technology Management                   | 0.37 | 26       | 2020 | -              |
| Xu et al. [162]                        | Review     | ✓        | ✓  | ✓  | ✓   | International Journal of Production Research                     | 1.91 | 139      | 2018 | 1880           |
| Aboelmaged [163]                       | Research   |          |    |    |     | Journal of Cleaner Production                                    | 1.94 | 245      | 2018 | 177            |
| Hao et al. [164]                       | Research   |          |    |    | ✓   | International Journal of Systems Science: Operations & Logistics | 1.12 | 62       | 2018 | 80             |
| Braccini and Margherita [50]           | Case study | ✓        | ✓  | ✓  | ✓   | Sustainability                                                   | 0.61 | 143      | 2019 | 166            |
| Bag et al. [92]                        | Research   |          |    |    |     | International Journal of Production Economics                    | 2.41 | 140      | 2021 | 147            |
| Moktadir et al. [165]                  | Research   |          |    |    |     | Journal of Cleaner Production                                    | 1.94 | 245      | 2018 | 240            |
| Oztemel and Gursev [129]               | Review     | ✓        | ✓  | ✓  | ✓   | Journal of Intelligent Manufacturing                             | 1.27 | 86       | 2020 | 881            |
| Xu and Wang [166]                      | Research   |          |    |    |     | Resources, Conservation and Recycling                            | 2.47 | 133      | 2018 | 106            |
| Zheng et al. [167]                     | Case study |          |    |    | ✓   | Frontiers of Mechanical Engineering                              | 0.84 | 40       | 2018 | 518            |
| Longo et al. [168]                     | Research   |          |    |    | ✓   | Computers & Industrial Engineering                               | 1.32 | 104      | 2017 | 381            |
| Moldavska and Welo [6]                 | Review     |          |    |    |     | Journal of Cleaner Production                                    | 1.94 | 245      | 2017 | 191            |
| Mabkhot et al. [169]                   | Survey     |          |    |    | ✓   | Machines                                                         | 0.4  | -        | 2018 | 152            |
| Kumar et al. [170]                     | Research   |          |    |    |     | Journal of Computational Science                                 | 0.7  | 73       | 2018 | 102            |
| Strozzi et al. [171]                   | Review     | ✓        |    |    |     | International Journal of Production Research                     | 1.91 | 139      | 2017 | 281            |

| Authors                         | Study Type | Subgroup |    |    |     | Publication Venue                                            | SJR  | h5 Index | Year | # of Citations |
|---------------------------------|------------|----------|----|----|-----|--------------------------------------------------------------|------|----------|------|----------------|
|                                 |            | IoT      | AM | CC | CPS |                                                              |      |          |      |                |
| Bhanot et al. [172]             | Research   |          |    |    |     | Journal of Cleaner Production                                | 1.94 | 245      | 2017 | 176            |
| Lezoche and Panetto [174]       | Research   |          |    |    | ✓   | Enterprise Information Systems                               | 0.6  | 53       | 2018 | 29             |
| Wilkesmann and Wilkesmann [176] | Case study |          |    |    | ✓   | VINE Journal of Information and Knowledge Management Systems | 0.4  | 40       | 2018 | 167            |
| Lucas-Estan et al. [177]        | Research   | ✓        |    |    |     | IEEE Transactions on Industrial Informatics                  | 2.5  | 149      | 2021 | 10             |
| Frank et al. [178].             | Review     | ✓        |    |    |     | International Journal of Production Economics                | 2.41 | 140      | 2019 | 1144           |
| Hoang and Pietrosanto [179]     | Case study |          |    |    | ✓   | IEEE Sensors Journal                                         | 0.68 | 112      | 2021 | 8              |
| Li et al. [180]                 | Case study |          |    |    | ✓   | Sensors                                                      | 0.64 | 179      | 2022 | -              |
| Kamble et al. [85]              | Review     | ✓        |    |    |     | Process Safety and Environmental Protection                  | 1.17 | 87       | 2018 | 700            |
| Raj et al. [113]                | Research   | ✓        | ✓  | ✓  | ✓   | International Journal of Production Economics                | 2.41 | 140      | 2020 | 295            |
| Olsen and Tomlin [181]          | Research   |          | ✓  |    |     | Manufacturing & Service Operations Management                | 7.37 | 70       | 2019 | 183            |
| Müller [182]                    | Research   | ✓        |    |    |     | Journal of Manufacturing Technology Management               | 1.29 | 70       | 2019 | 143            |
| Bag et al. [183]                | Review     |          |    | ✓  |     | Journal of Cleaner Production                                | 1.94 | 245      | 2021 | 85             |
| Chiarello et al. [184].         | Research   | ✓        |    |    |     | Computers in Industry                                        | 1.43 | 109      | 2018 | 191            |
| de Sousa Jabbour et al. [185]   | Research   | ✓        | ✓  | ✓  | ✓   | Technological Forecasting and Social Change                  | 2.23 | 165      | 2018 | 517            |
| Machado et al. [83]             | Review     | ✓        | ✓  | ✓  | ✓   | International Journal of Production Research                 | 1.91 | 139      | 2019 | 285            |
| Park et al. [186]               | Research   | ✓        |    |    |     | International Journal of Computer Integrated Manufacturing   | 0.88 | 55       | 2019 | 92             |
| Popkova and Sergi [187]         | Research   | ✓        |    |    |     | Journal of Intellectual Capital                              | 1.26 | 78       | 2020 | 204            |
| Gupta et al. [188]              | Research   | ✓        |    |    |     | Journal of Cleaner Production                                | 1.94 | 245      | 2021 | 62             |
| Bag et al. [189]                | Research   |          |    | ✓  |     | Technological Forecasting and Social Change                  | 2.23 | 165      | 2021 | 121            |
| Cimini et al. [190]             | Case study | ✓        | ✓  | ✓  | ✓   | Journal of Manufacturing Technology Management               | 1.29 | 70       | 2021 | 67             |
| Ejsmont [4]                     | Research   | ✓        | ✓  | ✓  | ✓   | Sustainability                                               | 0.61 | 143      | 2021 | 11             |

|                         |          |   |   |   |   |                                                 |      |     |      |     |
|-------------------------|----------|---|---|---|---|-------------------------------------------------|------|-----|------|-----|
| Pejic-Bach et al. [191] | Research | ✓ | ✓ | ✓ | ✓ | International Journal of Information Management | 2.77 | 164 | 2020 | 125 |
| Matt et al. [192]       | Research | ✓ | ✓ | ✓ | ✓ | Computers & Industrial Engineering              | 1.32 | 104 | 2020 | 75  |
| Luthra and mangla [193] | Research |   | ✓ |   |   | Process Safety and Environmental Protection     | 1.17 | 87  | 2018 | 475 |
| Szabó-Szentgróti [22]   | Review   | ✓ | ✓ | ✓ | ✓ | Sustainability                                  | 0.61 | 143 | 2021 | 12  |

Note: the articles [6, 92, 136, 163, 165, 166, 170, 172] do not specify the technology, however, the studies were introduced to SLR for their contribution and quality to the study area.
