# Supplementary figures and images for: Opportunities of the Technological Trends Linked to Industry 4.0 for Achieve Sustainable Manufacturing Objectives
Source: MDPI journal article supplement (doi:10.3390/su141811118), 2022-09-06

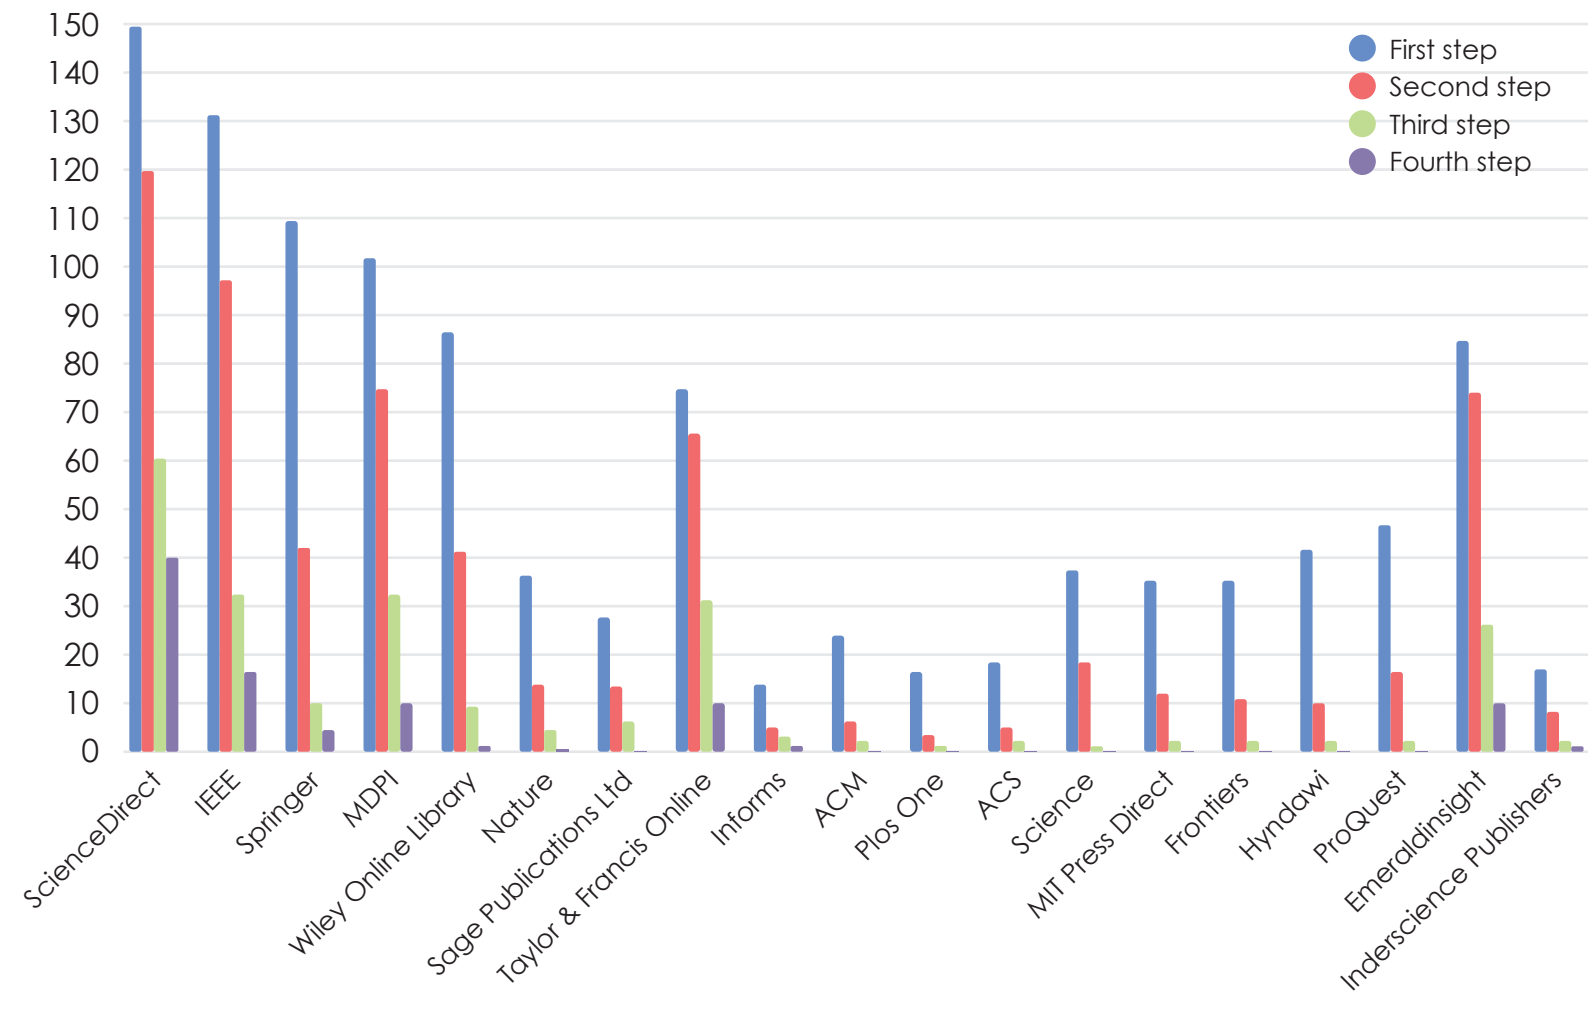

Supplement: s1 [file s1]

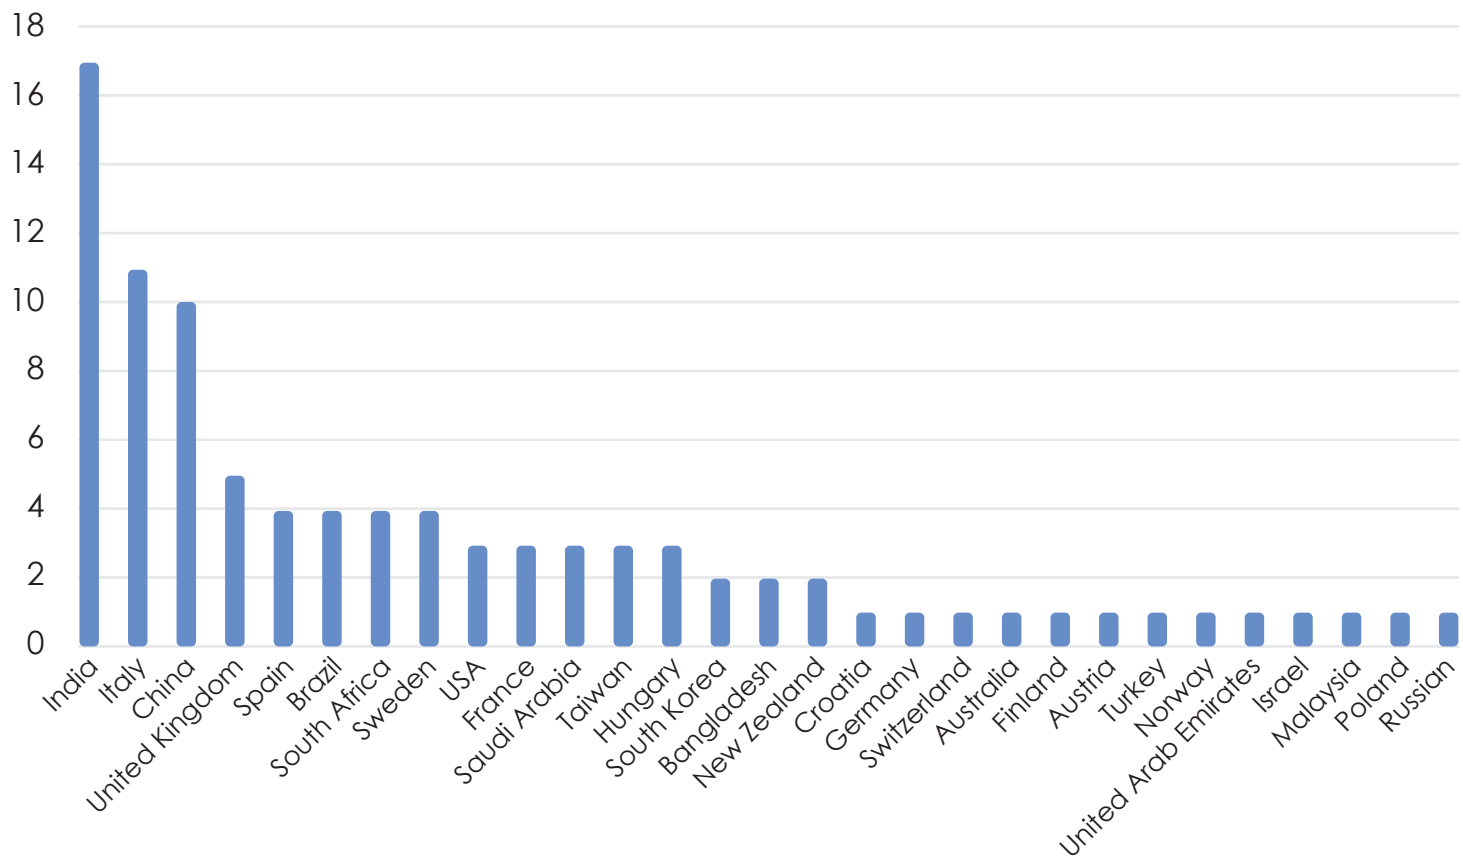

Supplement: s1 [file s1]
